# 1 **Retention of adults from fishing communities in an HIV** 2 **vaccine preparedness study in Masaka, Uganda**

3 **Authors:** Ubaldo Bahemuka<sup>1</sup>, Andrew Abaasa<sup>1</sup>, Eugene Ruzagira<sup>1</sup>, Christina Lindan<sup>3</sup>, Matt A Price<sup>2</sup>,  
4 <sup>3</sup>, Anatoli Kamali<sup>2</sup>, Pat Fast<sup>2</sup>

5 **Authors affiliations:** <sup>1</sup>Medical Research Council (MRC)/Uganda Virus Research Institute (UVRI)  
6 and London School of Hygiene and Tropical Medicine Uganda Research Unit, Entebbe, Uganda; <sup>2</sup>  
7 International AIDS Vaccine Initiative, New York, USA; <sup>3</sup>University of California, San Francisco

8 **Running title:** Cohort retention among fishing communities, Uganda

9 **Corresponding author:** Ubaldo Bahemuka, MRC/UVRI & LSHTM Uganda Research Unit .  
10 P.O Box 49 Entebbe, Uganda. Phone: +256 (0)417 704000, Mobile +256 702 523665

## 11 **Author's emails**

12 Ubaldo Bahemuka: [Ubaldo.Bahemuka@mrcuganda.org](mailto:Ubaldo.Bahemuka@mrcuganda.org), [Ubaldo.Bahemuka@lshtm.ac.uk](mailto:Ubaldo.Bahemuka@lshtm.ac.uk)

13 Andrew Abaasa: [Andrew.Abaasa@mrcuganda.org](mailto:Andrew.Abaasa@mrcuganda.org)

14 Eugene Ruzagira: [Eugene.Ruzagira@mrcuganda.org](mailto:Eugene.Ruzagira@mrcuganda.org)

15 Christina Lindan: [Kryisia.Lindan@ucsf.edu](mailto:Kryisia.Lindan@ucsf.edu)

16 Matt A Price: [MPrice@iavi.org](mailto:MPrice@iavi.org)

17 Anatoli Kamali: [AKamali@iavi.org](mailto:AKamali@iavi.org)

18 Pat Fast: [PFast@iavi.org](mailto:PFast@iavi.org)

19

20 **Key words:** Retention, drop-out, Fishing communities, HIV vaccine preparedness study.

21 **Abstract:** 260 words, **Text:** 3,028 words, **Tables:** 02, **Graphs:** 01

22 **Conflicts of interest:** No conflict of interest

## 23 **Abstract**

24 **Introduction:** People living in fishing communities around Lake Victoria may be  
25 suitable for enrolment in HIV prevention trials because of high HIV incidence. We assessed  
26 the ability to recruit and retain individuals from fishing communities into an HIV vaccine  
27 preparedness cohort study in Masaka, Uganda.

28 **Methods:** HIV high risk, sero-negative adults (18-49 years) were identified from four  
29 fishing villages bordering Lake Victoria through door-to-door HIV counselling and testing  
30 (HCT). Interested persons were referred for: screening, enrolment, and quarterly follow-up  
31 visits at a study clinic located approximately 40 kilometres away. Repeat HCT, HIV risk  
32 assessment, and evaluation and treatment for sexually transmitted infections were provided.  
33 Rates of and factors associated with study dropout were assessed using Poisson regression  
34 models.

35 **Results:** A total of 940 participants were screened between January 2012 and February  
36 2015, of whom 654 were considered for the analysis. Over a two-year follow-up period, 197  
37 (30.1%) participants dropped out of the study over 778.9 person-years, a dropout rate of 25.3  
38 / 100 person-years. Dropout was associated with being female (aRR =1.56, 95% confidence  
39 interval [CI] 1.12-2.18), age, being 18-24 years (aRR=1.64; 95% CI 1.03-2.60), 25-34 years  
40 (aRR=1.63; 95% CI 1.04-2.55); having no education (aRR=2.02; 95% CI: 1.23-3.31); living  
41 in the community for less than one year (aRR=2.22; 95% CI: 1.46-3.38) or 1-5 years  
42 (aRR=1.68; 95% CI: 1.16-2.45) and occupation.

43 **Conclusions:** It is possible to recruit and retain individuals from fishing communities,  
44 however, intensified participant tracing may be necessary in a vaccine trial to keep in follow  
45 up female, young, less educated, those in mobile occupations and new residents.

## 47 **Introduction**

48 New HIV infections continue to occur in sub-Saharan Africa, despite behavioural and  
49 biomedical prevention efforts(1). Therefore, development of an effective HIV vaccine will be  
50 essential to reducing incidence in this region(2). Efficacy testing of HIV vaccine candidates is  
51 more efficient among populations with favourable retention and high HIV incidence rates(3).  
52 Fishing communities in Uganda have a high burden of HIV with HIV prevalence and  
53 incidence ranging from 20-40 percent (4-6) and 3-9 cases per 100 person-years of  
54 observation (PYO) respectively (7-9). This high level of risk suggests that persons living in  
55 these communities may be an ideal population for HIV vaccine efficacy trials. However,  
56 fishing communities are typically located in remote areas and often have little if any health  
57 care infrastructure, factors that may present challenges to the rigorous implementation  
58 requirements of HIV vaccine preparedness and efficacy studies(10).

59 A number of studies have evaluated the suitability of fishing communities around Lake  
60 Victoria for participation in future HIV vaccine efficacy trials in terms of participant  
61 retention. In three recent studies, (9, 11, 12) the 12-month retention was reported to be 83%  
62 ,77% and 85% respectively. In these studies, recruitment and follow up assessments were  
63 conducted at clinics established in each of the participating fishing community. During the  
64 conduct of a Simulated HIV vaccine trial(SiVET) in the cohort of our study, Abaasa et al  
65 (13)reported a 73%% retention in the observational arm of the study.

66 In some cases, it may be advantageous to conduct an efficacy trial in a central location,  
67 recruiting volunteers from surrounding areas. The clinical research centre in Masaka town  
68 situated is inland from the neighbouring fishing communities. Little is known about how  
69 retention might be affected if participants from fishing communities had to travel to a clinic  
70 outside of their communities to attend study visits. In order to answer this question, we

71 investigated retention and dropout rates among fisher folk enrolled in a HIV vaccine  
72 preparedness cohort at a research clinic located approximately 40 km away from their  
73 communities.

## 74 **Methods**

### 75 **Setting and participant identification**

76 The International AIDS Vaccine Initiative (IAVI) in collaboration with the Medical Research  
77 Council/Uganda Virus Research Institute Research (MRC/UVRI) has supported a clinical  
78 research centre in rural South Western Uganda with the aim of conducting future HIV  
79 vaccine efficacy trials. The research Centre is located in Masaka town, approximately 30 to  
80 40 kilometers (km) away from the shores of Lake Victoria. The clinic is equipped to conduct  
81 HIV vaccine trials, Good Clinical Laboratory Practice (GCLP) accredited laboratory, a  
82 vaccine pharmacy, and Good Clinical Practice (GCP) trained staff (14). The HIV vaccine  
83 preparedness study described here was conducted among individuals identified from four  
84 mainland fishing communities on the shore of Lake Victoria located in Masaka and Kalungu  
85 districts, in southwest Uganda. These communities were selected because they had the largest  
86 populations ( $\geq 1000$  adults) among fishing communities in these two districts.

87 Between January 2012 and January 2015 a field study team consisting of both male and female  
88 counselors visited houses, docked boats, fishing stalls and other venues at the four landing-  
89 sites, to offer free rapid HIV testing and counseling on-site to adults. Persons aged 18-49 years  
90 old who were identified as HIV uninfected were asked if they would be willing to enroll into a  
91 longitudinal study that would require repeated travel to the research clinic. Those who had a  
92 positive rapid test result underwent confirmatory testing by having venous blood samples re-  
93 tested at the MRC/UVRI laboratory in Entebbe. The participants with confirmed HIV positive

94 results were invited by the field team on phone or physically to receive their results at the clinic  
95 approximately one to two weeks after the blood draw. HIV positive participants were linked to  
96 care at a treatment center of their choice in accordance with the clinics HIV referral plan.

## 97 **Screening and enrolment**

98 Interested individuals who travelled to the study clinic were given detailed information about  
99 study procedures in a group setting. Individuals also had one-on-one sessions with a study  
100 nurse-counselor who provided additional study information, answered questions, and  
101 obtained written informed consent. After obtaining consent participants were assessed for  
102 eligibility based on the following criteria: being 18-49 years, HIV uninfected, and sexually  
103 active defined as having had sex at least once in the last the three months. Participants also  
104 needed to be considered at high risk of HIV acquisition by reporting at least one of the  
105 following: self-reported history of a sexually transmitted infection (STI) in the last three  
106 months, or the presence of an STI based on medical history/physical exam; condomless  
107 vaginal or anal intercourse with a new or with more than one sexual partner in the past 3  
108 months; staying away from home for at least two nights in the past three months; drinking  
109 alcohol at least once a week or using illicit drugs (marijuana, Khat, or any other stimulants) in  
110 the past month. Participants who fulfilled the above criteria were enrolled into the study.  
111 They then completed interviewer-administered questionnaires in either the local language  
112 (Luganda) or English, depending on their preference. All enrolled participants had a baseline  
113 demographic interview and HIV risk assessment by the study nurse counsellor. The study  
114 physician, performed a medical history and physical exam to assess for STI and circumcision  
115 status for males. Participants provided physical addresses and phone numbers in order to  
116 facilitate future contacts and follow-up.

117

## 118 **Follow-up visits**

119 Participants returned to the clinic every three months for repeat HIV counselling and testing,  
120 provision of updated locator information and interim medical history. Everyone underwent a  
121 symptom-directed physical exam and a clinical evaluation for STIs. Every six months'  
122 participants provided information on HIV risk behaviour, and were evaluated annually if they  
123 continued to fulfil the requirements for participation in the study. At month 12, volunteers  
124 were re-assessed for eligibility based on the above risk of HIV acquisition criteria.  
125 Participants who were determined to no longer be eligible were withdrawn from the study. If  
126 a participant missed a scheduled appointment, study staff would attempt to contact them via  
127 phone or physical tracing by visiting their home. A group of 10 study participants who were  
128 considered peer leaders assisted with participant tracing. Participants who missed two  
129 consecutive visits were considered to have dropped-out at the time of their last study visit. To  
130 bolster study retention, continuous interaction was kept with community advisory board and  
131 study staff conducted a series of community activities (research awareness meetings and  
132 football matches among others) as a way of improving research awareness. Participants  
133 received reimbursement for transportation and time (5000 Uganda shillings, approximately  
134 1.4 USD) at the end of each visit.

## 135 **Laboratory testing**

136 Rapid HIV antibody testing was performed on venous blood samples using a single rapid test,  
137 Alere Determine (Alere Medical Company Ltd. Chiba, Japan). Specimens that were positive  
138 by rapid test were tested with two enzyme linked immunosorbent assay (ELISA) tests in  
139 parallel (Murex Biotech Limited, Dartford, United Kingdom, and Vironostika, BioMérieux  
140 boxtel, The Netherlands). Discrepant ELISA test results were resolved by testing with either  
141 Statpak (Chembio Diagnostic Systems Inc., USA) or Western Blot (Cambridge Biotech,



142 USA). The results of HIV negative rapid tests were given to participants immediately; while  
143 participants with confirmed HIV positive results were invited by the field team to receive  
144 their results approximately one to two weeks after the blood draw and referred as described  
145 earlier. Syphilis testing was performed using the rapid plasma reagin (RPR) test (Microvue,  
146 Becton Dickson, Maryland, USA). Samples with an RPR titre of  $\geq 1:8$  were also tested using  
147 the Treponema Pallidum Hemagglutination Assay (TPHA) (Biotech Laboratories, UK). Active  
148 syphilis infection was defined as having both a positive RPR titre of  $\geq 1:8$  and a positive  
149 TPHA result.

## 150 **Statistical analysis**

151 Data were analysed in Stata 14.0 (Stata Corp, College Station, TX, USA). Participant baseline  
152 characteristics were summarised using proportions and means, and stratified by gender.  
153 Proportions and means were used to compare baseline characteristics of participants who  
154 dropped out of the study to those that completed their scheduled follow up visits. Dropout was  
155 defined as all-cause (including withdrawal by self or investigator, death, unknown loss-to-  
156 follow-up and refusal to continue) over a maximum of 24 months of follow-up. Participants  
157 that were ineligible at the annual reassessment of eligibility to continue were not considered as  
158 dropouts and contributed follow up time up to 12 months. HIV sero-positive participants were  
159 not considered to have dropped out, but their follow up was censored at the estimated date of  
160 HIV infection. Time of HIV infection was estimated as the midpoint between the date of the  
161 last negative and the first positive HIV test result. Seventy-two of the enrolled participants that  
162 were enrolled but did not return for any follow up visit had their person years of observation  
163 (PYO) corrected to one month and the same added to all participants' PYO. The dropout rate  
164 was estimated as the number of participants who dropped out divided by the total person years  
165 of observation (PYO). The PYO were calculated as the sum of the time from enrolment

166 (baseline) to the date of the last clinic visit or date of censoring. Dropout rates were compared  
167 by demographic and clinical characteristics. Rate ratios (RR) and 95% confidence intervals  
168 (CI) were calculated for the association of factors with dropping out using a Poisson regression  
169 model. All factors for which univariate associations attained a significance of  $p < 0.1$  on the  
170 log-likelihood test were included in an initial multivariable model. Factors were retained in the  
171 multivariable model if the p-value for inclusion using the log-likelihood test was  $\leq 0.05$ . We  
172 calculated a Kaplan- Meier estimate of dropout rate over time for the participants in the cohort.  
173 We further performed a sensitivity analysis excluding seventy-two that never returned at all for  
174 follow up. Similar approaches as for the primary analysis were followed for the sensitivity  
175 analysis.

## 176 **Ethical considerations**

177 The study was approved by the Research and Ethics Committee of the Uganda Virus  
178 Research Institute, and by the Uganda National Council of Science and Technology. Written  
179 informed consent was obtained from each participant before enrolment. Those who were  
180 confirmed to be HIV sero-positive were referred for HIV care and treatment at the  
181 appropriate facility.

## 182 **RESULTS**

### 183 **Screening and enrolment**

184 A total of 940 individuals were screened between January 2012 and February 2015; 279 were  
185 not enrolled (245 were at low risk for HIV, 8 were HIV-infected, and 26 were excluded for  
186 other reasons). We present data on 654 (69.6%) participants who were due for at least one  
187 follow-up visit.

## 188 **Baseline characteristics**

189 The majority (61.4%) of the participants were male, Table 1. The mean age was 27.7 years  
 190 (SD 6.9). Nearly half were married, most (71.3%) had attained primary education and  
 191 engaged in fishing or related occupations (51.1%). The majority of the sample (76.9%) was  
 192 of Christian faith and of Baganda ethnicity (44.0%). Only a third had lived in the fishing  
 193 community for more than five years and about 50% had stayed away from home for at least  
 194 two days in the last three months. Most (60.0%) reported having two to three sexual partners  
 195 in the last three months and three quarters reported having a new sexual partner in the same  
 196 period with 63.5% reporting condom use with this new partner. Majority of the participants  
 197 462(70.6) were recruited from Lambu fishing community.

198 **Table 1: Baseline socio-demographic and behavioural characteristics of men and women enrolled**  
 199 **in a longitudinal HIV vaccine preparedness study, Masaka, Uganda**

| Variable                              | All   |      | Male  |      | Female |      | P-value of gender difference |
|---------------------------------------|-------|------|-------|------|--------|------|------------------------------|
|                                       | N=654 |      | N=402 |      | N=252  |      |                              |
|                                       | n     | (%)  | n     | (%)  | n      | (%)  |                              |
| <b>Age (years)</b>                    |       |      |       |      |        |      | 0.003                        |
| 35+                                   | 248   | 38.0 | 132   | 32.8 | 116    | 46.0 |                              |
| 25-34                                 | 282   | 43.0 | 186   | 46.3 | 96     | 38.1 |                              |
| 18-24                                 | 124   | 19.0 | 84    | 20.9 | 40     | 15.9 |                              |
| <b>Current marital status</b>         |       |      |       |      |        |      | <0.001                       |
| Single                                | 186   | 28.4 | 132   | 32.8 | 54     | 21.4 |                              |
| Married                               | 319   | 48.8 | 217   | 54.0 | 102    | 40.5 |                              |
| Separated/Widowed/divorced            | 149   | 22.8 | 53    | 13.2 | 96     | 38.1 |                              |
| <b>Education level</b>                |       |      |       |      |        |      | 0.033                        |
| More than primary                     | 125   | 19.1 | 66    | 16.4 | 59     | 23.4 |                              |
| Primary                               | 466   | 71.3 | 301   | 74.9 | 165    | 65.5 |                              |
| None                                  | 63    | 9.6  | 35    | 8.7  | 28     | 11.1 |                              |
| <b>Occupation</b>                     |       |      |       |      |        |      | <0.001                       |
| Small scale business                  | 49    | 7.5  | 32    | 8.0  | 17     | 6.7  |                              |
| Fishing/fishing related <sup>1</sup>  | 334   | 51.1 | 280   | 69.6 | 54     | 21.4 |                              |
| Services(Bar/lodge/restaurant/saloon) | 67    | 10.2 | 21    | 5.2  | 46     | 18.3 |                              |

|                                                              |     |      |     |      |     |      |        |
|--------------------------------------------------------------|-----|------|-----|------|-----|------|--------|
| Other(Peasant farmer/House wife)                             | 204 | 31.2 | 69  | 17.2 | 135 | 53.6 |        |
| <b>Religion</b>                                              |     |      |     |      |     |      | 0.729  |
| Muslim                                                       | 151 | 23.1 | 91  | 22.6 | 60  | 23.8 |        |
| Christian                                                    | 503 | 76.9 | 311 | 77.4 | 192 | 76.2 |        |
| <b>Tribe/Ethnic group</b>                                    |     |      |     |      |     |      | <0.001 |
| Baganda                                                      | 288 | 44.0 | 178 | 44.3 | 110 | 43.7 |        |
| Banyankole                                                   | 93  | 14.2 | 58  | 14.4 | 35  | 13.9 |        |
| Banyarwanda                                                  | 136 | 20.8 | 64  | 17.9 | 72  | 28.6 |        |
| Other                                                        | 137 | 21.0 | 102 | 25.4 | 35  | 13.9 |        |
| <b>Duration of stay in community (years)</b>                 |     |      |     |      |     |      | <0.001 |
| 0-< 1                                                        | 164 | 25.1 | 57  | 14.2 | 107 | 42.5 |        |
| >1- 5                                                        | 289 | 44.2 | 201 | 50.0 | 88  | 34.9 |        |
| > 5                                                          | 201 | 30.7 | 144 | 35.8 | 57  | 22.6 |        |
| <b>Fishing Community</b>                                     |     |      |     |      |     |      |        |
| Lambu                                                        | 462 | 70.6 | 279 | 69.4 | 183 | 72.6 | 0.776  |
| Kachanga                                                     | 68  | 10.4 | 45  | 11.9 | 23  | 9.13 |        |
| Kaziru                                                       | 32  | 4.9  | 21  | 5.2  | 11  | 4.3  |        |
| Other                                                        | 92  | 14.1 | 57  | 14.2 | 35  | 13.9 |        |
| <b>Away from home <math>\geq</math> 2 nights, last 3 mos</b> | 299 | 45.8 | 221 | 55.1 | 78  | 31.0 | <0.001 |
| <b>Number of sexual partners, last 3 mos</b>                 |     |      |     |      |     |      | <0.001 |
| 1                                                            | 215 | 32.8 | 80  | 19.9 | 135 | 53.6 |        |
| 2 to 3                                                       | 333 | 60.0 | 230 | 57.2 | 103 | 40.9 |        |
| 4 or more                                                    | 106 | 16.2 | 92  | 22.9 | 14  | 5.6  |        |
| <b>New sexual partner, last 3 mos</b>                        | 480 | 74.1 | 324 | 81.2 | 156 | 62.7 | <0.001 |
| <b>Condom use with new partner, last 3 mos</b>               | 305 | 63.5 | 205 | 63.3 | 100 | 64.1 | 0.859  |
| <b>Drank alcohol , in last month</b>                         |     |      |     |      |     |      |        |
| Never                                                        | 239 | 36.6 | 128 | 31.9 | 112 | 44.1 |        |
| Sometimes                                                    | 354 | 54.1 | 229 | 57.0 | 126 | 49.6 |        |
| Daily                                                        | 61  | 9.3  | 45  | 11.1 | 16  | 6.3  |        |
| <b>Drank alcohol before sex, in last month</b>               |     |      |     |      |     |      | 0.005  |
| Never                                                        | 352 | 53.8 | 197 | 49.0 | 155 | 61.5 |        |
| Sometimes                                                    | 204 | 31.2 | 135 | 33.6 | 69  | 27.4 |        |
| Always                                                       | 98  | 15   | 70  | 17.4 | 28  | 11.1 |        |
| <b>Drug use, in last month</b>                               |     |      |     |      |     |      | <0.001 |
| None                                                         | 570 | 87.2 | 334 | 83.1 | 236 | 93.7 |        |
| Marijuana                                                    | 35  | 5.3  | 25  | 6.2  | 10  | 4.0  |        |
| Khat                                                         | 41  | 6.3  | 39  | 9.7  | 2   | 0.8  |        |
| Other                                                        | 8   | 1.2  | 4   | 1.0  | 4   | 1.6  |        |
| <b>Genital sores, last 3 mos, self-report</b>                | 272 | 41.6 | 145 | 36.1 | 127 | 50.4 | <0.001 |
| <b>Laboratory confirmed syphilis</b>                         | 23  | 3.5  | 16  | 4.0  | 7   | 2.8  | 0.417  |
| <b>Circumcised</b>                                           | --  | --   | 164 | 42.0 | --  | --   |        |

200 Mos-Month

201 More women (46.0%) than men (32.8%) were more than 35 years of age,  $p=0.003$ . More men  
202 than women reported being single (32.8% vs. 21.4%) and being divorced or widowed (38.1%  
203 vs. 13.2%),  $p<0.001$ . More women had attained more than primary education (23.4% vs.  
204 16.4%,  $p=0.033$ ). While most (69.6%) of the men were involved in fishing or fishing related  
205 occupations, most women (53.6%) were engaged in other activities,  $p<0.001$ . At enrolment, a  
206 higher proportion of men reported having been living in the community for more than 5 years  
207 (35.8%) compared to women (22.6%),  $p<0.001$ . More than half of men (55.1%) reported  
208 spending more than two nights away from home compared to women (31.0%),  $p<0.001$ . In  
209 the previous three months, more women (53.6%) than men (19.9%) reported having had only  
210 one sexual partner,  $p<0.001$ . More males (82.1%) reported having new partners in the last  
211 three months compared to females (62.7%),  $p<0.001$ . More males (17.4%) than females  
212 (11.1%) reported always drinking before sex,  $p=0.005$ .

## 213 **Study drop out**

214 One hundred ninety-seven (30.1%) of participants dropped out of the study, (Figure 1),  
215 including 72 who did not return for the first follow up visit at month three. The dropout rate  
216 averaged over the entire 24-month study period was 25.3 / 100 PYO (95% CI: 22.0-29.1),  
217 Table 2. Excluding the 72 volunteers who never returned, the dropout rate was 17.1/100  
218 PYO (95% CI 14.4-20.4). The most common reasons for dropping out included: moving  
219 away from study area (112), being untraceable (26), withdrawal from the study (31), and  
220 death (3). Fifteen participants were determined to be ineligible due to lower risk at the 12-  
221 month visit, and did not participate further (i.e. they were not counted among drop outs).  
222 During the two years, 45 participants became HIV-infected and were also not counted among  
223 drop outs. The HIV incidence amongst study participants in this cohort of 6.04 per 100  
224 person years at risk (95% confidence interval: 4.36 – 8.37) has been reported previously (15).

225 **Table 2: Demographic and behavioural factors associated with study drop out (DO)**

| Variable                               | N   | DO  | PYO   | DO/100PO | RR(95% CI)      | LRT P-value | aRR(95% CI)     | LRT p-value |
|----------------------------------------|-----|-----|-------|----------|-----------------|-------------|-----------------|-------------|
| <b>Overall 2 year drop out</b>         | 654 | 197 | 778.9 | 25.3     |                 |             |                 |             |
| <b>Gender</b>                          |     |     |       |          |                 |             |                 |             |
| Male                                   | 402 | 103 | 507.9 | 20.3     | Ref             | <0.001      | Ref             | 0.002       |
| Female                                 | 252 | 94  | 270.9 | 34.7     | 1.7(1.29-2.26)  |             | 1.56(1.12-2.18) |             |
| <b>Age (years)</b>                     |     |     |       |          |                 |             |                 |             |
| 35+                                    | 124 | 25  | 166.3 | 15       | Ref             | 0.004       | Ref             | 0.007       |
| 25-34                                  | 282 | 88  | 340.3 | 25.9     | 1.72(1.10-2.68) |             | 1.63(1.04-2.55) |             |
| 18-24                                  | 248 | 84  | 272.2 | 30.9     | 2.05(1.31-3.21) |             | 1.64(1.03-2.60) |             |
| <b>Current marital status</b>          |     |     |       |          |                 |             |                 |             |
| Single                                 | 186 | 64  | 217.4 | 29.4     | Ref             | 0.107       |                 |             |
| Married                                | 319 | 85  | 394.5 | 21.5     | 0.73(0.58-1.01) |             |                 |             |
| Separated/Widowed                      | 149 | 48  | 166.9 | 28.8     | 0.98(0.67-1.42) |             |                 |             |
| <b>Educational level</b>               |     |     |       |          |                 |             |                 |             |
| More than primary                      | 125 | 39  | 156.0 | 25       | Ref             | 0.013       | Ref             | 0.01        |
| Primary                                | 466 | 131 | 563.3 | 23.3     | 0.93(0.65-1.33) |             | 1.06(0.74-1.52) |             |
| None                                   | 63  | 27  | 59.5  | 45.4     | 1.82(1.11-2.97) |             | 2.02(1.23-3.31) |             |
| <b>Occupation</b>                      |     |     |       |          |                 |             |                 |             |
| Small scale business                   | 49  | 8   | 68.3  | 11.7     | Ref             | 0.006       | Ref             | 0.035       |
| Fishing/fishing related <sup>1</sup>   | 334 | 99  | 413.2 | 24       | 2(0.99-4.21)    |             | 1.98(0.95-4.11) |             |
| Services (Bar/lodge/restaurant/saloon) | 67  | 17  | 80.0  | 21.2     | 1.8(0.78-4.21)  |             | 1.18(0.50-2.78) |             |
| Other                                  | 204 | 73  | 217.3 | 33.6     | 2.9(1.38-5.95)  |             | 2.05(0.98-4.31) |             |
| <b>Religion</b>                        |     |     |       |          |                 |             |                 |             |
| Muslim                                 | 151 | 41  | 187.8 | 21.8     | Ref             | 0.272       |                 |             |
| Christian                              | 503 | 156 | 591.1 | 26.4     | 1.21(0.86-1.70) |             |                 |             |
| <b>Tribe/Ethnic group</b>              |     |     |       |          |                 |             |                 |             |
| Baganda                                | 288 | 83  | 339.2 | 24.5     | Ref             | 0.762       |                 |             |

|                                                              |     |     |       |      |                 |        |                 |       |
|--------------------------------------------------------------|-----|-----|-------|------|-----------------|--------|-----------------|-------|
| Banyankole                                                   | 93  | 29  | 103.1 | 28.1 | 1.15(0.75-1.75) |        |                 |       |
| Banyarwanda                                                  | 136 | 39  | 170.3 | 23   | 0.94(0.64-1.37) |        |                 |       |
| Other                                                        | 137 | 46  | 166.3 | 27.7 | 1.13(0.79-1.62) |        |                 |       |
| <b>Duration of stay in community (years)</b>                 |     |     |       |      |                 |        |                 |       |
| >5                                                           | 201 | 41  | 277.8 | 14.8 | Ref             | <0.001 | Ref             | 0.004 |
| 1 to 5                                                       | 289 | 92  | 341.3 | 27   | 1.83(1.26-2.64) |        | 1.68(1.16-2.45) |       |
| 0-<1                                                         | 164 | 64  | 160.0 | 40   | 2.71(1.83-4.02) |        | 2.22(1.46-3.38) |       |
| <b>Fishing community</b>                                     |     |     |       |      |                 |        |                 |       |
| Lambu                                                        | 462 | 144 | 555.5 | 25.9 | Ref             | 0.474  |                 |       |
| Kachanga                                                     | 68  | 10  | 39.6  | 25.2 | 0.97(0.51-1.85) |        |                 |       |
| Kaziru                                                       | 32  | 14  | 79.9  | 17.5 | 0.68(0.39-1.67) |        |                 |       |
| Other                                                        | 92  | 29  | 103.8 | 27.9 | 1.07(0.72-1.61) |        |                 |       |
| <b>Away from home <math>\geq</math> 2 nights, last 3 mos</b> |     |     |       |      |                 |        |                 |       |
| No                                                           | 354 | 107 | 425.1 | 25.2 | Ref             | 0.912  |                 |       |
| Yes                                                          | 299 | 90  | 351.9 | 25.6 | 1.02(0.77-1.34) |        |                 |       |
| <b>Number of sexual partners, last mos</b>                   |     |     |       |      |                 |        |                 |       |
| 0-1                                                          | 215 | 64  | 261.7 | 24.5 | Ref             | 0.565  |                 |       |
| 2 to 3                                                       | 333 | 97  | 396.8 | 24.4 | 0.99(0.73-1.37) |        |                 |       |
| 4 +                                                          | 106 | 36  | 120.4 | 29.9 | 1.22(0.81-1.84) |        |                 |       |
| <b>New sexual partner, last 3 mos</b>                        |     |     |       |      |                 |        |                 |       |
| No                                                           | 168 | 48  | 205.9 | 23.3 | Ref             | 0.469  |                 |       |
| Yes                                                          | 480 | 148 | 563.7 | 26.3 | 1.12(0.81-1.56) |        |                 |       |
| <b>Condom with new partner, last 3 mos</b>                   |     |     |       |      |                 |        |                 |       |
| No                                                           | 175 | 60  | 198.7 | 30.2 | Ref             | 0.322  |                 |       |
| Yes                                                          | 305 | 88  | 365.0 | 24.1 | 0.79(0.57-1.11) |        |                 |       |
| <b>Drank alcohol, last month</b>                             |     |     |       |      |                 |        |                 |       |
| Never                                                        | 293 | 80  | 280.5 | 22.9 | Ref             | 0.41   |                 |       |
| Sometimes                                                    | 354 | 98  | 418.9 | 19.2 | 0.82(0.61-1.10) |        |                 |       |
| Daily                                                        | 61  | 19  | 79.4  | 15.3 | 0.84(0.51-1.38) |        |                 |       |

|                                           |     |     |       |      |                 |       |  |  |
|-------------------------------------------|-----|-----|-------|------|-----------------|-------|--|--|
| <b>Drank alcohol before sex, last mos</b> |     |     |       |      |                 |       |  |  |
| Never                                     | 239 | 113 | 407.8 | 27.7 | Ref             | 0.368 |  |  |
| Sometimes                                 | 354 | 58  | 254.3 | 22.8 | 0.82(0.59-1.13) |       |  |  |
| Always                                    | 61  | 26  | 116.8 | 22.3 | 0.8(0.52-1.23)  |       |  |  |
| <b>Illicit drugs use,in last month</b>    |     |     |       |      |                 |       |  |  |
| None                                      | 570 | 169 | 680.5 | 24.8 | Ref             | 0.754 |  |  |
| Khat                                      | 35  | 11  | 46.8  | 23.5 | 0.94(0.51-1.74) |       |  |  |
| Marijuana                                 | 41  | 14  | 42.8  | 32.7 | 1.32(0.76-2.27) |       |  |  |
| Other                                     | 8   | 3   | 8.9   | 33.7 | 1.35(0.43-4.24) |       |  |  |
| <b>Genital sores, in last 3 months</b>    |     |     |       |      |                 |       |  |  |
| No                                        | 382 | 114 | 454.7 | 25.1 | Ref             | 0.884 |  |  |
| Yes                                       | 272 | 83  | 324.1 | 25.6 | 1.02(0.77-1.36) |       |  |  |
| <b>Laboratory Confirmed Syphilis</b>      |     |     |       |      |                 |       |  |  |
| No                                        | 591 | 180 | 695.1 | 25.9 | Ref             |       |  |  |
| Yes                                       | 63  | 17  | 83.7  | 20.3 | 0.78(0.48-1.36) |       |  |  |
| <b>Male circumcision</b>                  |     |     |       |      |                 |       |  |  |
| Yes                                       | 164 | 64  | 296.3 | 21.6 | Ref             |       |  |  |
| No                                        | 231 | 37  | 202.6 | 18.3 | 0.84(0.56-1.27) |       |  |  |

226

<sup>1</sup>Drying fish, salting or smoking fish, Mos-Month



227 Factors that remained independently associated with dropping out in the adjusted analysis  
228 included: gender, with females at increased risk of dropping out (adjusted rate ratio (aRR)  
229 =1.56; 95% CI 1.12-2.18) compared to males, education level, with participants having no  
230 education at all being twice more likely to drop out (aRR= 2.02; 95% CI: 1.23-3.31) than  
231 those with more than primary education (Table 2). Younger participants were at greater risk  
232 of dropping out, those aged 18-24 years old (aRR=1.64; 95% CI: 1.03-2.06) and 25-34 years  
233 old (aRR = 1.63; 95% CI: 1.04-2.55) compared to those aged 35+ years. Short duration of  
234 stay in community, participants who reported to have lived in the fishing community for one  
235 year or less were two times more likely to drop out (aRR=2.22; 95% CI: 1.46-3.38) compared  
236 to those who had spent over 5 years. Occupation was also independently associated with drop  
237 out with participants engaged in fishing (aRR=1.98; 95% CI: 0.95-4.11), services (aRR=1.18;  
238 95% CI: 0.50-2.78) and other (aRR=2.05; 95% CI: 0.98-4.31) being more likely to drop out  
239 than those involved in small scale business.

240 Compared to those who completed at least one follow up visit, those who never returned for  
241 follow up were younger (mean age of 25.5 vs. 28.0; p=0.004) and more likely to have had no  
242 education (19.4% vs 8.4%, p=0.010) and to have lived for less than a year in the community  
243 (45.8% vs 22.5%, p<0.001).

## 244 **DISCUSSION**

245 In this HIV vaccine preparedness open cohort study among fisher folk, we observed a  
246 dropout rate of 25.3/100 person years of observation over the 2-year duration of follow-up, or  
247 17.1/100 PYO if you exclude those who never returned for any follow up visits. The findings  
248 from our study build on reports from previous work conducted on these and other similar  
249 populations around Lake Victoria. Retention rates of 85% (12) and 77% (11) were reported  
250 in two other fisher folk cohorts in which participants were followed up in community-based

251 clinics. Our study differs from these studies in three main aspects firstly, these studies (11-13)  
252 differed from our study in that they reported their retention as proportions, while our study is  
253 reporting a dropout rate over the two year period. Though the difference may be modest, a  
254 proportion will typically overestimate drop out compared to a rate (i.e., 30.1% of our study  
255 participants dropped out, but our rate was 25.3 drop outs per 100 PYO). Secondly the study  
256 retention for some of the studies (11, 12) were performed in the fishing communities whereas  
257 our study activities were at a distant study clinic, and thirdly some also (11, 13) reported their  
258 retention over a period of 1 year compared to 2 years in our study.

259 The observed high rate of drop out at the month 3 may point to the fact that some participants  
260 were willing to enrol but were simply unwilling to return for any follow up. This finding  
261 suggests for the adoption of a lead-in type of enrolment scheme for clinical trials involving  
262 participants from these fishing communities.

263 Even though we provided reimbursement for transportation and time, as well as free STI  
264 treatment, this may not have been adequate to overcome the hurdles of having to travel to a  
265 distant research site. Distance from home could have affect retention in follow up. In a  
266 cohort study conducted among discordant couples in Kenya, it was discovered that  
267 participants who were living 5-10 kilometres away from the clinic were twice as likely to  
268 have follow-up interruptions compared to those living less than 5 kilometres(16). Although  
269 no differences were observed in dropout rates between the different fishing communities, it is  
270 possible that the distance from the fishing communities to the clinic could have contributed to  
271 the drop out.

272 We found that persons who had lived in the community for a relatively short time were more  
273 likely to drop out of the study. This findings is consistent with those of previous studies in  
274 Uganda fishing communities (11) (12). It is likely that being in a community for a shorter

275 period of time is a proxy for people who are more likely to be migratory and who tend to  
276 move between different islands and landing sites usually following the seasonal fishing  
277 seasons (17). I think this would be a good spot to talk about enrolment village and distance  
278 to masaka study clinic, and if we did/did not see any relationships

279 Women may also be less likely to be retained, because they usually have time demanding  
280 roles within a family including care for sick family members, provision of care for children  
281 and food. It is possible too that some women are commercial sex workers and who might  
282 move from place to place depending on the demand for their services. Women will therefore  
283 find difficulty in taking time off to come to the clinic. Since it is important to ensure that men  
284 and women are equally engaged in HIV vaccine efficacy trials, efforts need to be made to  
285 increase female enrolment and retention in clinical trials within these communities.

286 Participation of women from the fishing communities can potentially be improved by  
287 involvement of individuals or groups in the community who have ample rapport with them,  
288 such as, their spouses, brothel owners, bar and lodge owners.

289 The observation that younger participants are more likely to drop out. This finding is similar  
290 to what was observed in the previous studies (11, 12) and may be due to the fact that young  
291 people possibly haven't settled in any stable relationship/occupation and are still moving in  
292 search of greener pastures.

293 The strength of this study included longer duration of follow up with frequent clinic visit in a  
294 set up with an already established infrastructure suitable for HIV vaccine efficacy trials. This  
295 builds on the previous studies that provided retention data but from follow up at clinics  
296 established within the fishing communities.

297 Our study had some limitations. Firstly, we were often not able to document the specific  
298 reasons why participants dropped out, other than some data on relocation. This information

299 could have probably provided more insight on the specific reasons for dropping out.  
300 Secondly, at the initial contact with potential participants in the fishing communities, we did  
301 not collect data on those who attended meetings but who did not later attend screening visits  
302 at the Masaka study clinic, nor did we collect data on those who attended screening at the  
303 clinic but were not enrolled (aside from reason they were not enrolled), thus we were unable  
304 to make comparisons between enrolled and non-enrolled persons. Thirdly, we did not collect  
305 data on breastfeeding or pregnancy among the females, which may have also been barriers  
306 for participation and retention, since these may affect ones travel to and from the study clinic.

307

## 308 **Conclusions**

309 Although we demonstrate ability to enrol participants in this longitudinal cohort, the high  
310 dropout rate especially in the first three months is a point of concern. Inclusion of volunteers  
311 into clinical trials to evaluate products such as vaccine candidates would require delayed  
312 enrolment and consider an initial pre-screening period of approximately 2-3 months,  
313 requiring potential volunteers to attend more than one screening visit to establish  
314 commitment. Particular attention for retention should be paid to the participant categories  
315 identified as being a risk of dropping out such as female, younger, lower educated and  
316 participants with short duration of stay in the community.

## References

1. UNAIDS. UN Joint Programme on HIV/AIDS (UNAIDS), Global AIDS Update - 2016, June 2016. June 2016, .
2. Mwau M, McMichael AJ. A review of vaccines for HIV prevention. *The Journal of Gene Medicine*. 2003;5(1):3-10.
3. AIDS in Africa. In: Essex M, editor. 2nd ed. ed. New York :: Kluwer Academic/Plenum Publishers; 2002.
4. Asiki G, Mpendo J, Abaasa A, Agaba C, Nanvubya A, Nielsen L, et al. HIV and syphilis prevalence and associated risk factors among fishing communities of Lake Victoria, Uganda. *Sex Transm Infect*. 2011;87(6):511-5.
5. Kiwanuka N, Ssetaala A, Mpendo J, Wambuzi M, Nanvubya A, Sigirenda S, et al. High HIV-1 prevalence, risk behaviours, and willingness to participate in HIV vaccine trials in fishing communities on Lake Victoria, Uganda. *Journal of the International AIDS Society*. 2013;16:18621.
6. Opio A, Muyonga M, Mulumba N. HIV infection in fishing communities of Lake Victoria Basin of Uganda--a cross-sectional sero-behavioral survey. *PloS one*. 2013;8(8):e70770.
7. Seeley J, Nakiyingi-Miiró J, Kamali A, Mpendo J, Asiki G, Abaasa A, et al. High HIV incidence and socio-behavioral risk patterns in fishing communities on the shores of Lake Victoria, Uganda. *Sex Transm Dis*. 2012;39(6):433-9.
8. Kiwanuka N, Ssetaala A, Nalutaaya A, Mpendo J, Wambuzi M, Nanvubya A, et al. High incidence of HIV-1 infection in a general population of fishing communities around Lake Victoria, Uganda. *PLoS One*. 2014;9(5):e94932.
9. Ondondo RO, Ngĩ`angi`a ZW, Mpoke S, Kiptoo M, Bukusi EA. Prevalence and Incidence of HIV Infection among Fishermen along Lake Victoria Beaches in Kisumu County, Kenya. *World Journal of AIDS*. 2014;Vol.04No.02:13.
10. Seeley JA, Allison EH. HIV/AIDS in fishing communities: Challenges to delivering antiretroviral therapy to vulnerable groups. *AIDS Care*. 2005;17(6):688-97.
11. Kiwanuka N, Mpendo J, Nalutaaya A, Wambuzi M, Nanvubya A, Kitandwe PK, et al. An assessment of fishing communities around Lake Victoria, Uganda, as potential populations for future HIV vaccine efficacy studies: an observational cohort study. *BMC Public Health*. 2014;14(1):986.
12. Abaasa A, Asiki G, Mpendo J, Levin J, Seeley J, Nielsen L, et al. Factors associated with dropout in a long term observational cohort of fishing communities around lake Victoria, Uganda. *BMC Research Notes*. 2015;8(1):815.
13. Abaasa A, Asiki G, Price MA, Ruzagira E, Kibengo F, Bahemuka U, et al. Comparison of HIV incidence estimated in clinical trial and observational cohort settings in a high risk fishing population in Uganda: Implications for sample size estimates. *Vaccine*. 2016;34(15):1778-85.
14. Kamali A, Price MA, Lakhi S, Karita E, Inambao M, Sanders EJ, et al. Creating an African HIV Clinical Research and Prevention Trials Network: HIV Prevalence, Incidence and Transmission. *PLoS One*. 2015;10(1):e0116100.
15. Kamali A, Nsubuga RN, Ruzagira E, Bahemuka U, Asiki G, Price MA, et al. Heterogeneity of HIV incidence: a comparative analysis between fishing communities and in a neighbouring rural general population, Uganda, and implications for HIV control. *Sexually transmitted infections*. 2016;92(6):447-54.
16. Conley NJ, Pavlinac PB, Guthrie BL, Mackelprang RD, Muir AN, Choi RY, et al. Distance from home to study clinic and risk of follow-up interruption in a cohort of HIV-1-discordant couples in Nairobi, Kenya. *PloS one*. 2012;7(8):e43138.
17. Nunan F. Mobility and fisherfolk livelihoods on Lake Victoria: implications for vulnerability and risk. *Geoforum*. 2010;41(5):776-85.

**Acknowledgement:** This work was funded by IAVI with the generous support of USAID and other donors; a full list of IAVI donors is available at [www.iavi.org](http://www.iavi.org). The contents of this manuscript are the responsibility of IAVI and co-authors and do not necessarily reflect the views of USAID or the US Government. We also wish to acknowledge support from the University of California, San Francisco's International Traineeships in AIDS Prevention Studies (ITAPS), U.S. NIMH, R25MH064712. As part of the ITAPS we thank the helpful reviews of Professor Rhoderick Machekano, and peer reviews of Drs Huub Gulderblom, Carol Camlin and Mi Suk. We recognise the logistical support of the Administration team at UCSF-ITAPS Dr Jeffery Mendel, Dr Debbie Brickley and Ritu Sehgal.

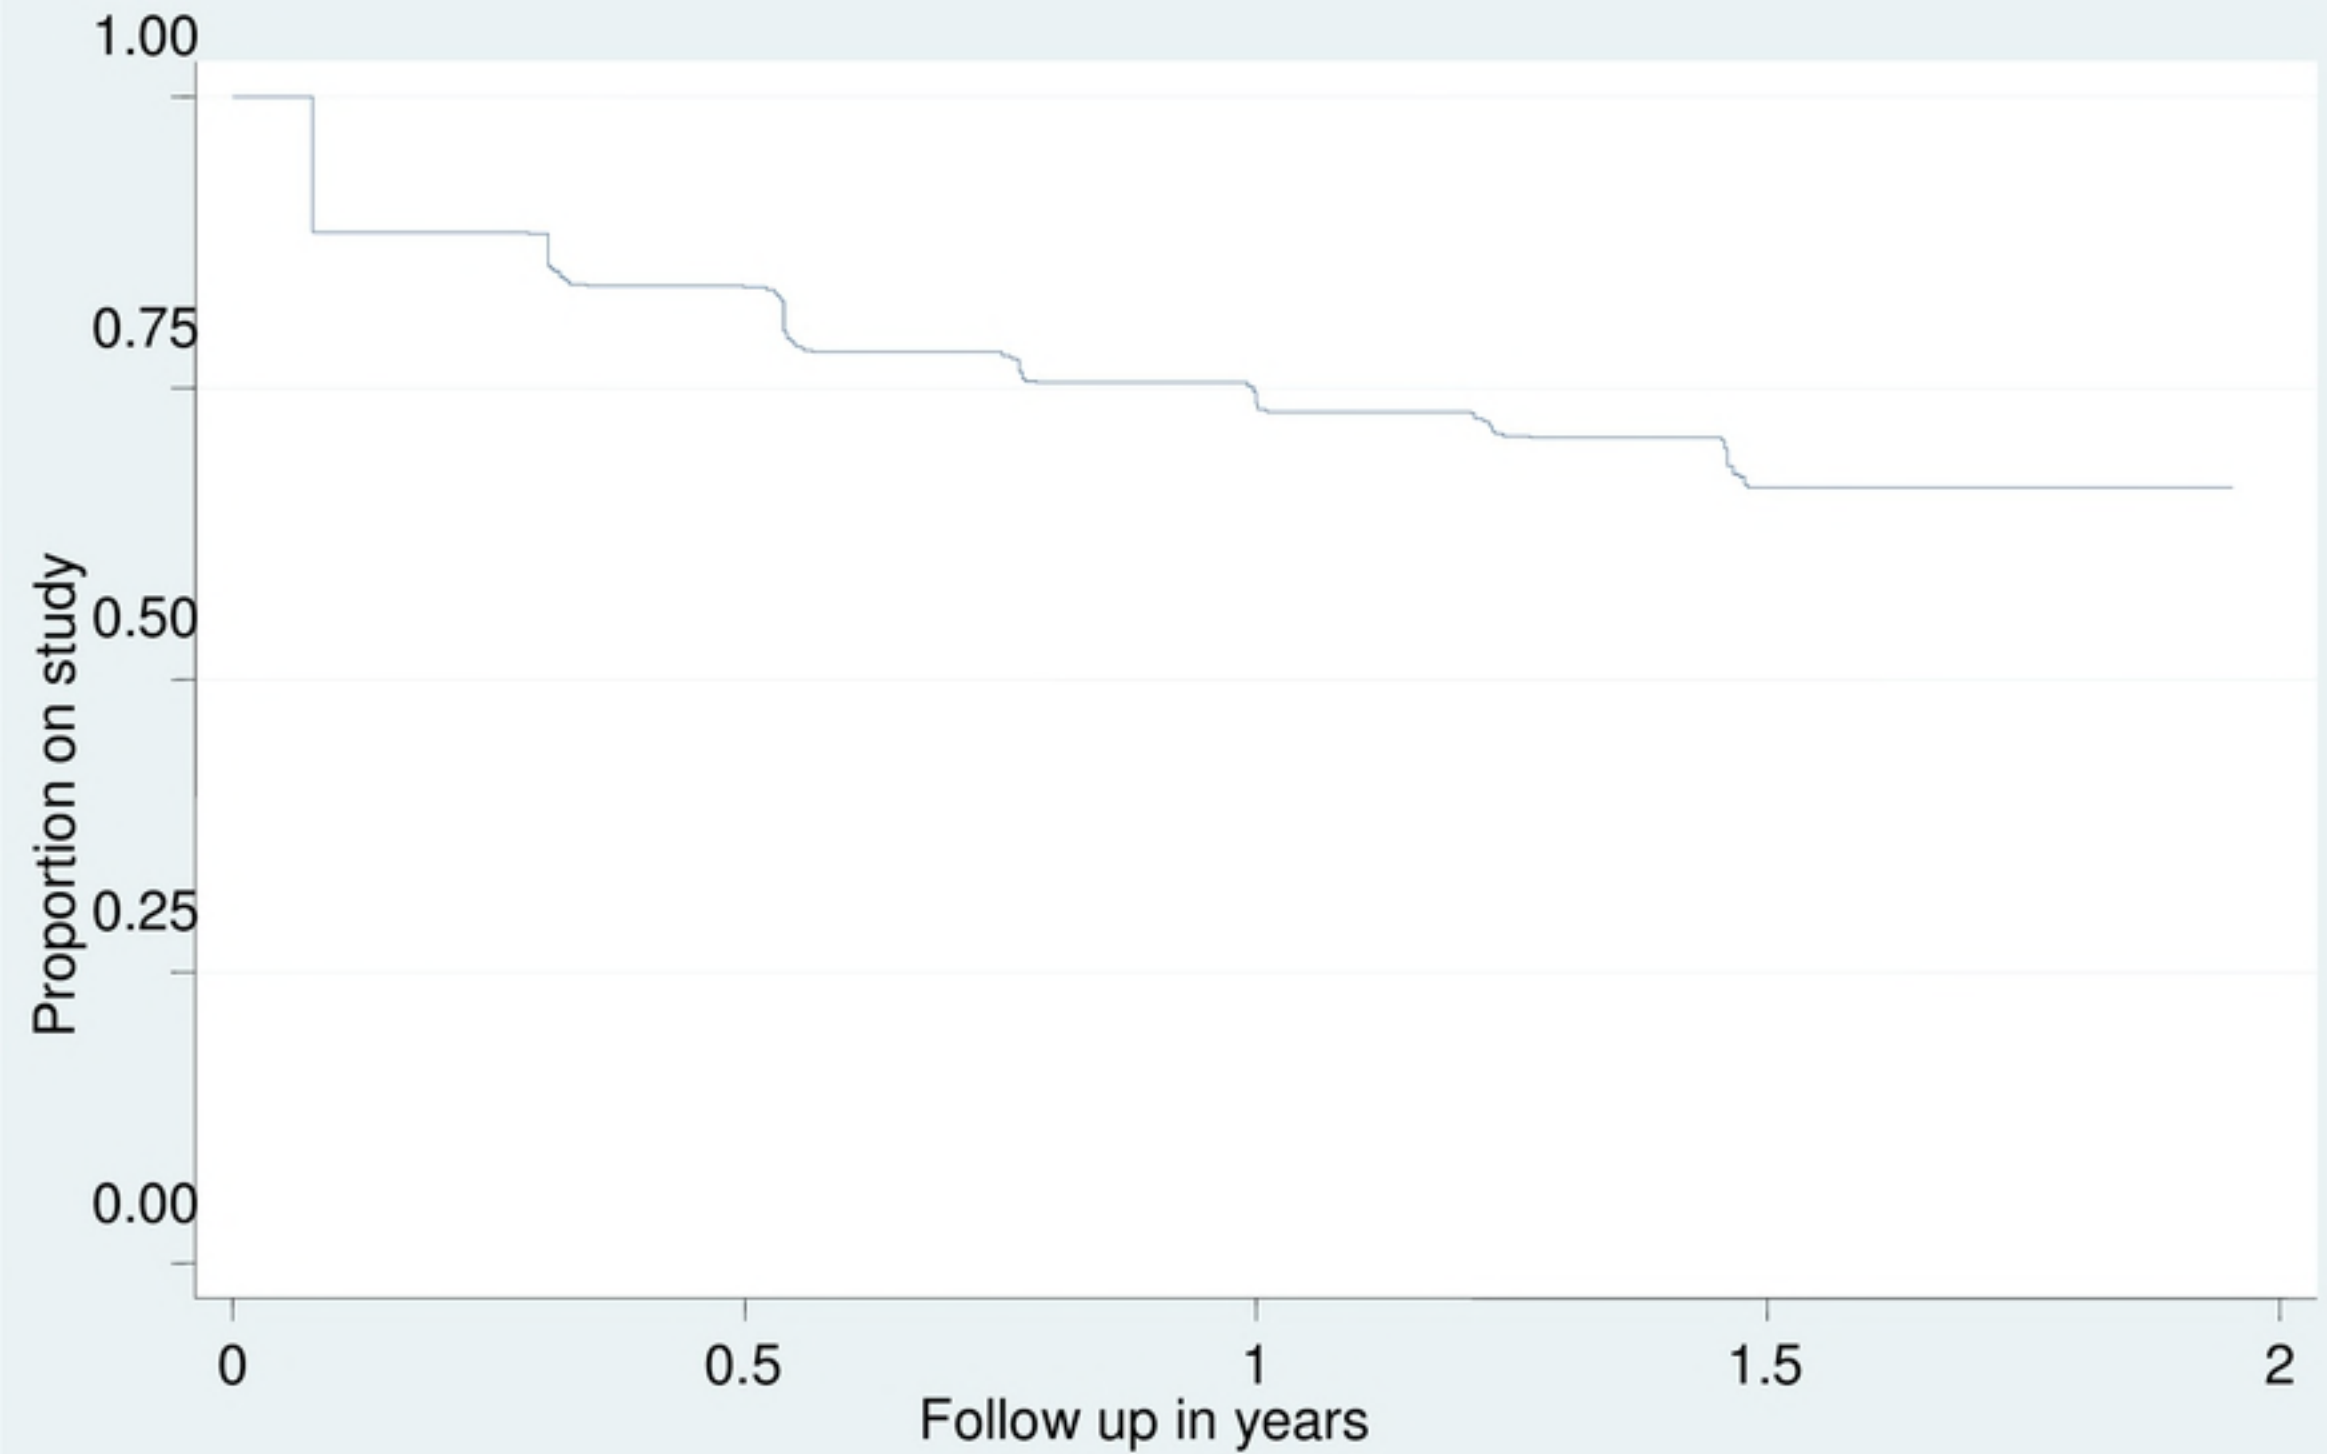

**Figure 1. Kaplan Meier plot of volunteer attrition over time**
